# Supplementary material for: Graph Convolutional Network and Convolutional Neural Network Based Method for Predicting lncRNA-Disease Associations
Source: MDPI journal article supplement (doi:10.3390/cells8091012), 2019-08-30
Supplement: s1 [file s1]

**Table S1.** AUC and AUPR of GCNLDA in each cross-validation.

| NO. | AUC   | AUPR  |
|-----|-------|-------|
| 1   | 0.961 | 0.225 |
| 2   | 0.957 | 0.222 |
| 3   | 0.959 | 0.223 |
| 4   | 0.962 | 0.226 |
| 5   | 0.956 | 0.219 |
